# Supplementary material
Source: publisher site journal article supplement (https://www.spandidos-publications.com/3346/downloadSupplementary)

Figure S1. Expression of NOX5 protein in colon cancer cells is detected by another anti-NOX5 antibody (orb100974) with similar levels. (A) Western blotting using 7 colon cancer cell lines. (B) Quantification of NOX5 protein expression by western blot analysis. Data are expressed as the mean  $\pm$  SEM. n=3. NOX, NADPH oxidase.

**A**

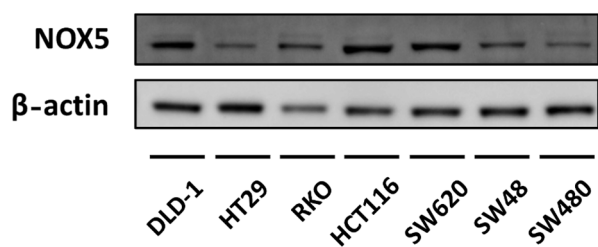

**B**

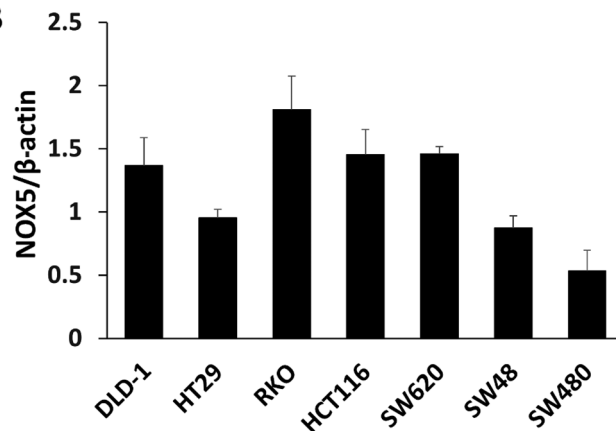

Figure S2. Wound healing assay in HCT116 cells. (A) Images at 0 and 24 h after removing the insert. (B) The horizontal cellular motility of NOX5 knockdown HCT116 cells was significantly inhibited. Data are expressed as the mean  $\pm$  SEM. n=3. \*\*P<0.01. NOX, NADPH oxidase; si, small interfering.

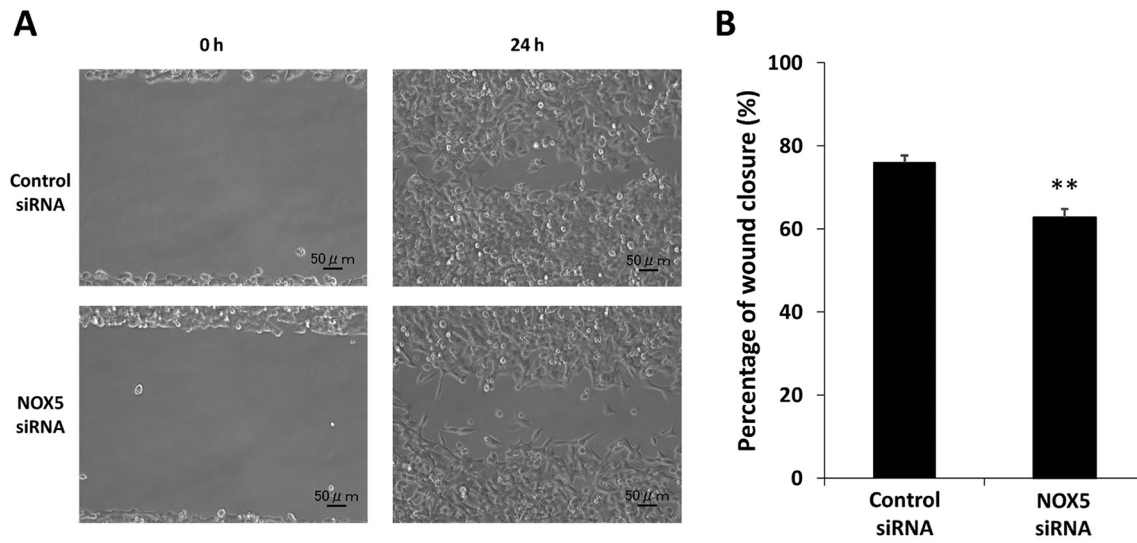

Figure S3. Level of extracellular hydrogen peroxidase is not decreased by NOX5 knockdown in both HCT116 and SW48 cells. (A) HCT116 cells. (B) SW48 cells. Data are expressed as the mean  $\pm$  SEM. n=3. \*P<0.05. NOX, NADPH oxidase; si, small interfering.

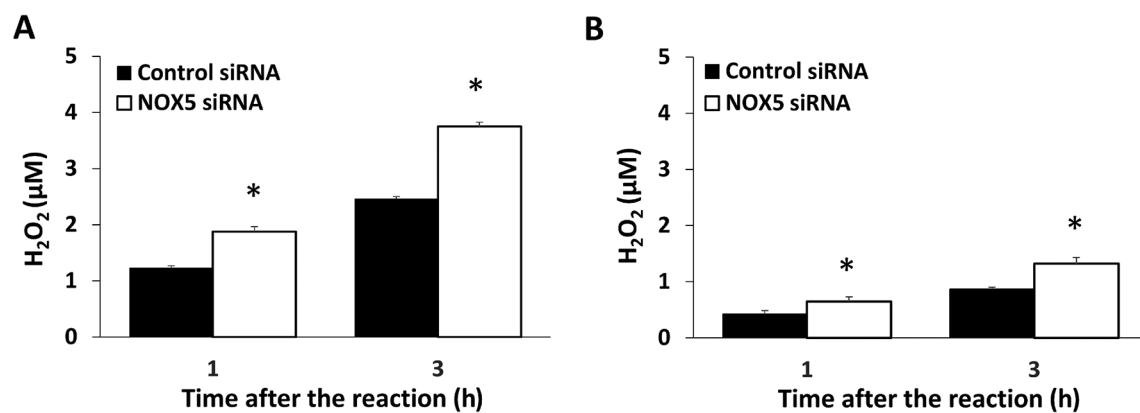

Supplement: Supplementary file 1 [file downloadSupplementary]
